# Supplementary material for: Single-cell profiling of Anopheles gambiae spermatogenesis defines the onset of meiotic silencing and premeiotic overexpression of the X chromosome
Source: PubMed Central journal article supplement (PMC10427639; doi:10.1038/s42003-023-05224-z), 2023-08-15
Supplement: 42003_2023_5224_MOESM3_ESM.pdf [file 42003_2023_5224_MOESM3_ESM.pdf]

## Description of Additional Supplementary Files

**File name:** Supplementary Data 1

**Description:** Differential expression analysis and cluster-enriched genes

**File name:** Supplementary Data 2

**Description:** Gene Ontology overrepresentation analysis

**File name:** Supplementary Data 3

**Description:** Source data for Figure 3. Feature table showing which genes are significantly enriched (1) or not enriched (0) in a specific cell-type cluster. Additional data shows total number of significantly enriched genes for in chromosome in each cell-type cluster.

**File name:** Supplementary Data 4

**Description:** Source data for Figure 4. Sum of Unique Molecular Identifiers (UMIs), alternatively referred to as transcript reads, for each cell grouped by cluster. Data shown for Autosome, X chromosome and Y contigs in separate tables.

**File name:** Supplementary Data 5

**Description:** Source data for Figure 5. Raw counts and log-transformed ( $\log_2(\text{counts}+1)$ ) counts per cell grouped by cell cluster and chromosome.
